# Supplementary material
Source: publisher figshare collection journal article supplement (https://tandf.figshare.com/ndownloader/files/13901288)

**Electronic Supplemental Material (ESM)**

**For**

**Potential Anti-Cancer Performance of Chitosan-Based β-ketosulfone Derivatives**

Khalid A. Alamry1*, Mahmoud A. Hussein1, 2*, Youssef O. Al-Ghamdi1, Tamer S. Saleh3, 4 Abdullah M. Asiri1,5 and Alawi M. Alhebshi1

1Department of Chemistry, Faculty of Science, King Abdulaziz University, P.O. Box 80203, Jeddah 21589, Saudi Arabia

2 Polymer Chemistry Lab. 122, Chemistry Department, Faculty of Science, Assiut University, P.O. Box 71516, Assiut, Egypt.

3Chemistry Department, Faculty of Science, Jeddah University, Jeddah 80327, Saudi Arabia

4 Green Chemistry Department, National Research Centre, Dokki, Cairo 12622, Egypt

5 Center of Excellence for Advanced Materials Research (CEAMR), King Abdulaziz University, P.O. Box 80203, Jeddah 21589, Saudi Arabia

* **Corresponding authors:** Khalid A. Alamry (k_alamry@yahoo.com and kaalamri@kau.edu.sa) and Mahmoud A. Hussein (mahussein74@yahoo.com, maabdo@kau.edu.sa, and mahmali@aun.edu.eg)

**Contents**

| **Figure No.** | **Title** | **Page** |
| --- | --- | --- |
| **Figure S1:** | 1H-NMR spectrum of 1-(4-bromophenyl)-2-(phenylsulfonyl)ethanone. | S4 |
| **Figure S2:** | 13C-NMR spectrum of 1-(4-bromophenyl)-2-(phenylsulfonyl)ethanone. | S5 |
| **Figure S3:** | FT-IR spectrum of 1-(4-bromophenyl)-2-(phenylsulfonyl)ethanone. | S6 |
| **Figure S4:** | 1H-NMR spectrum of 2-(phenylsulfonyl)-1-p-tolyl ethanone. | S7 |
| **Figure S5:** | 13C-NMR spectrum of 2-(phenylsulfonyl)-1-p-tolyl ethanone. | S8 |
| **Figure S6:** | FT-IR spectrum of 2-(phenylsulfonyl)-1-p-tolyl ethanone. | S9 |
| **Figure S7:** | 1H-NMR spectrum of 1-phenyl-2-(phenylsulfonyl)ethanone. | S10 |
| **Figure S8:** | 13C-NMR spectrum of 1-phenyl-2-(phenylsulfonyl)ethanone. | S11 |
| **Figure S9:** | FT-IR spectrum of 1-phenyl-2-(phenylsulfonyl)ethanone. | S12 |
| **Figure S10:** | 1H-NMR spectrum of1-(4-chlorophenyl)-2-(phenylsulfonyl)ethanone. | S13 |
| **Figure S11:** | 13C-NMR spectrum of 1-(4-chlorophenyl)-2-(phenylsulfonyl)ethanone. | S14 |
| **Figure S12:** | FT-IR spectrum of 1-(4-chlorophenyl)-2-(phenylsulfonyl)ethanone. | S15 |
| **Figure S13:** | 1H-NMR spectrum of 1-(4-fluorophenyl)-2-(phenylsulfonyl)ethanone. | S16 |
| **Figure S14:** | 13C-NMR spectrum of 1-(4-fluorophenyl)-2-(phenylsulfonyl)ethanone. | S17 |
| **Figure S15:** | FT-IR spectrum of 1-(4-fluorophenyl)-2-(phenylsulfonyl)ethanone. | S18 |


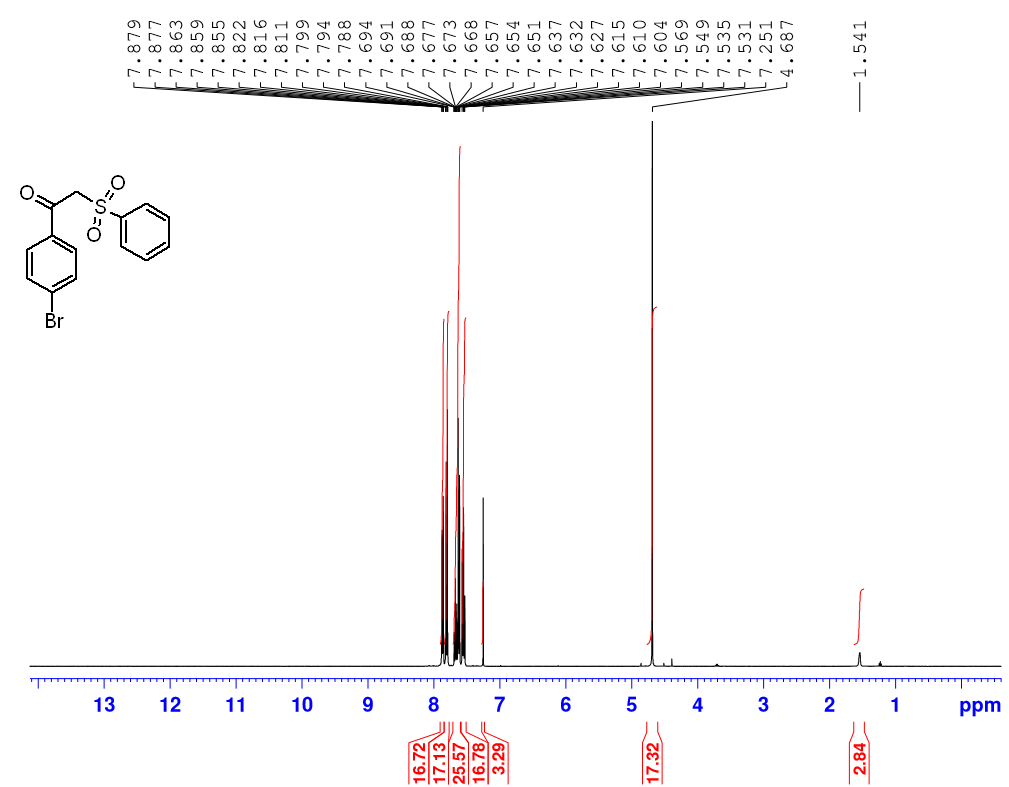

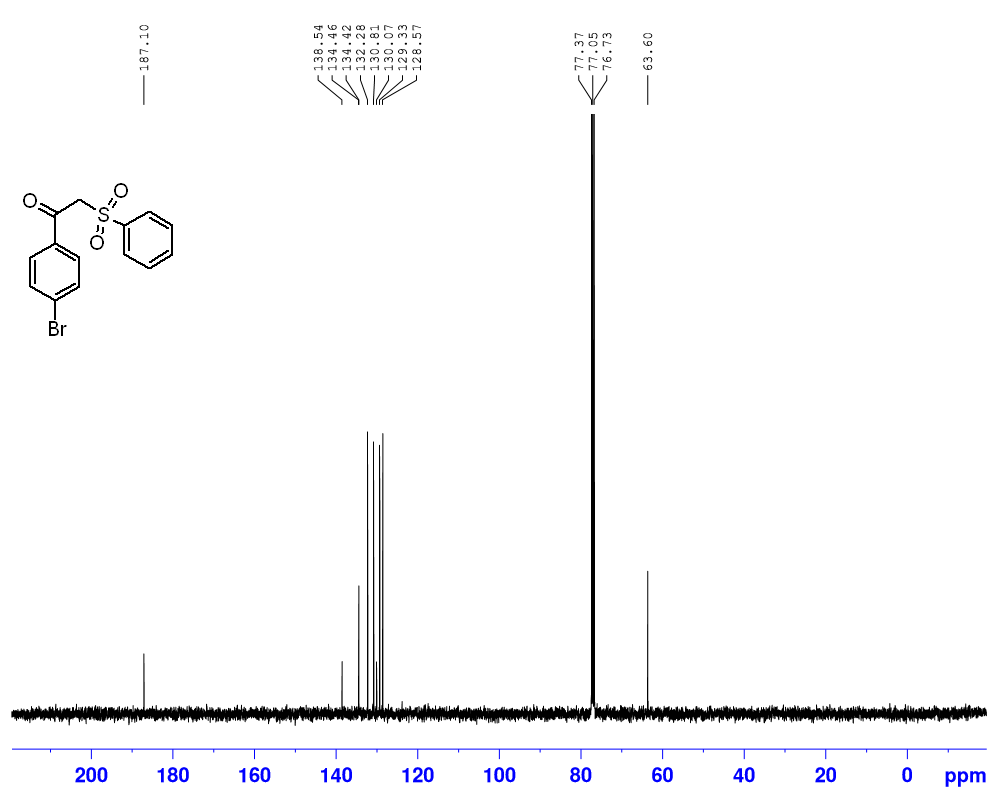


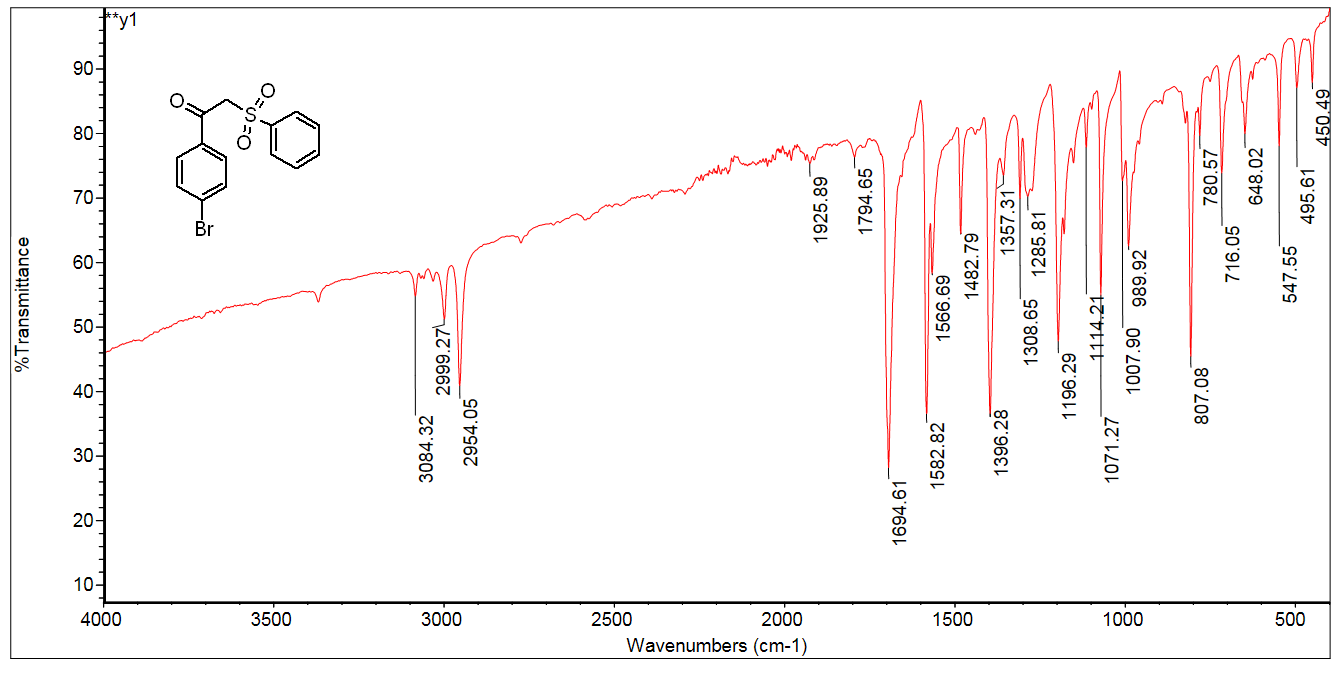

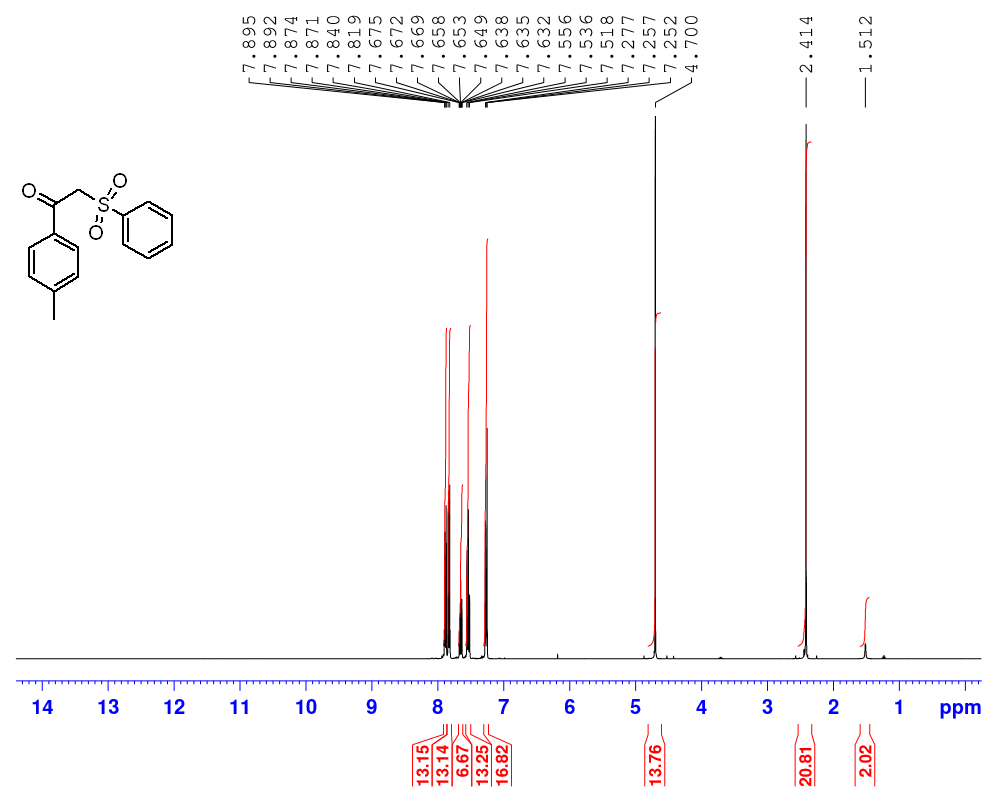

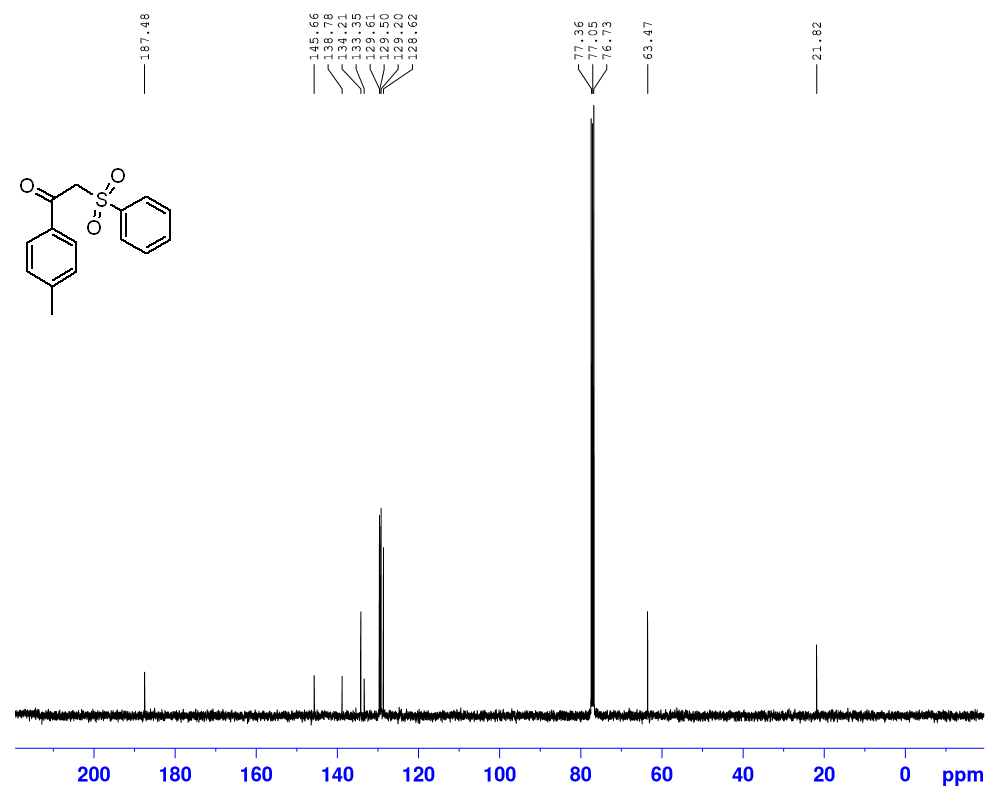


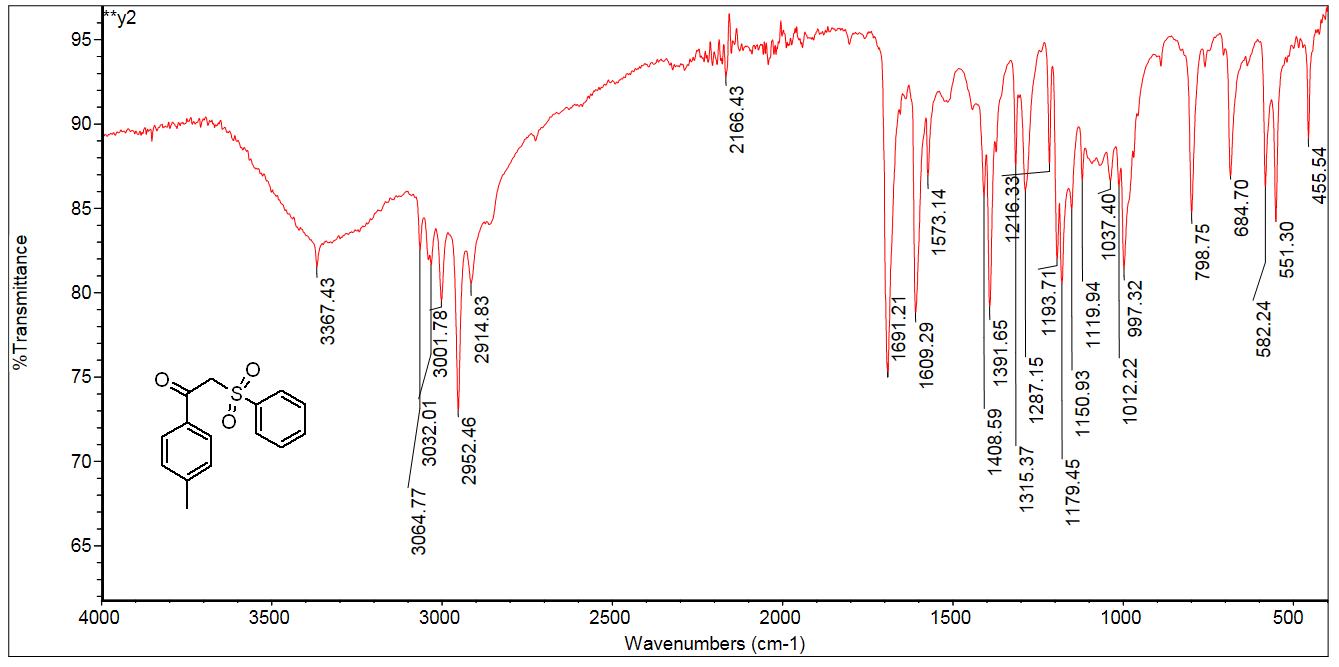

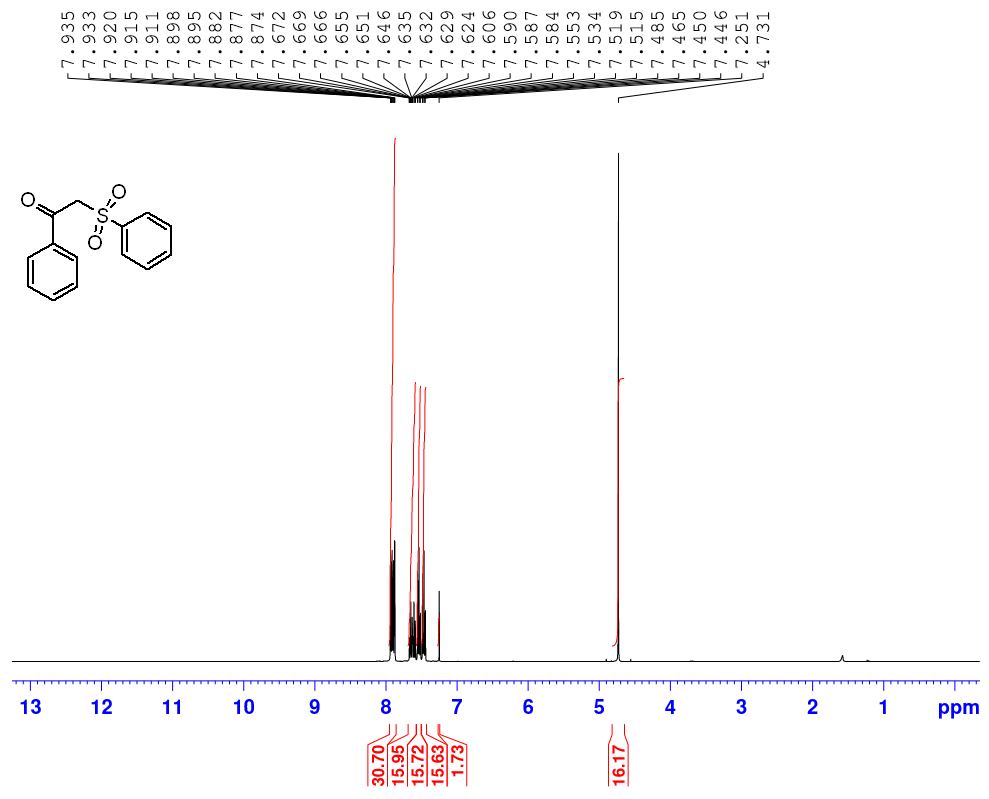

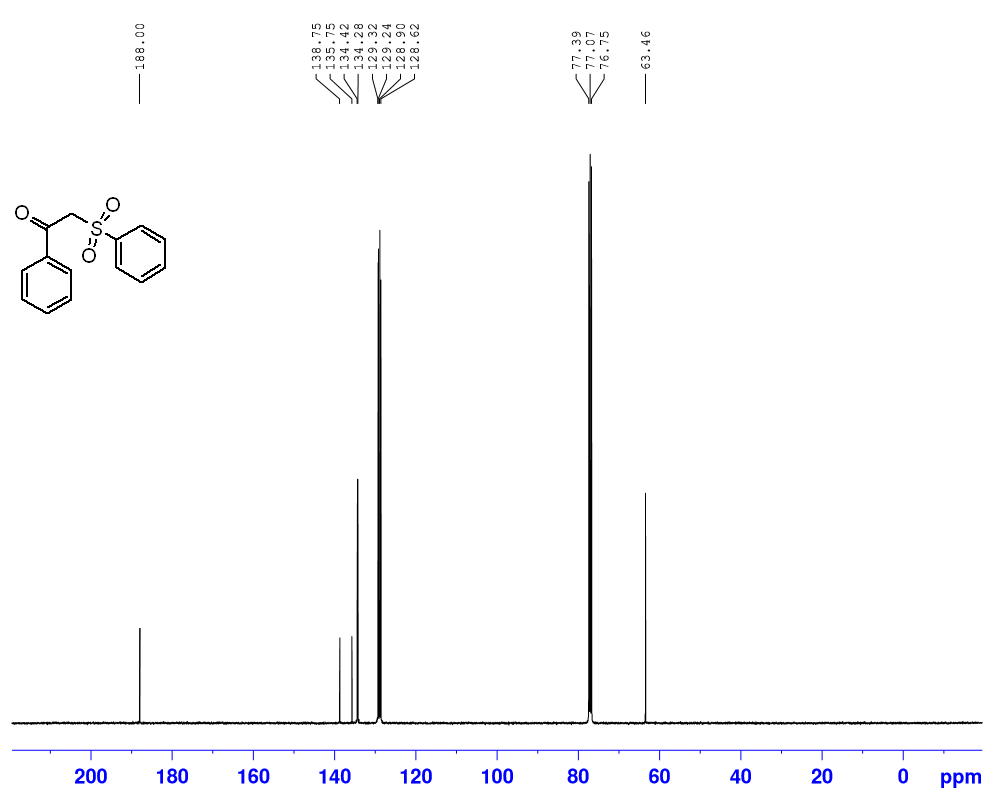


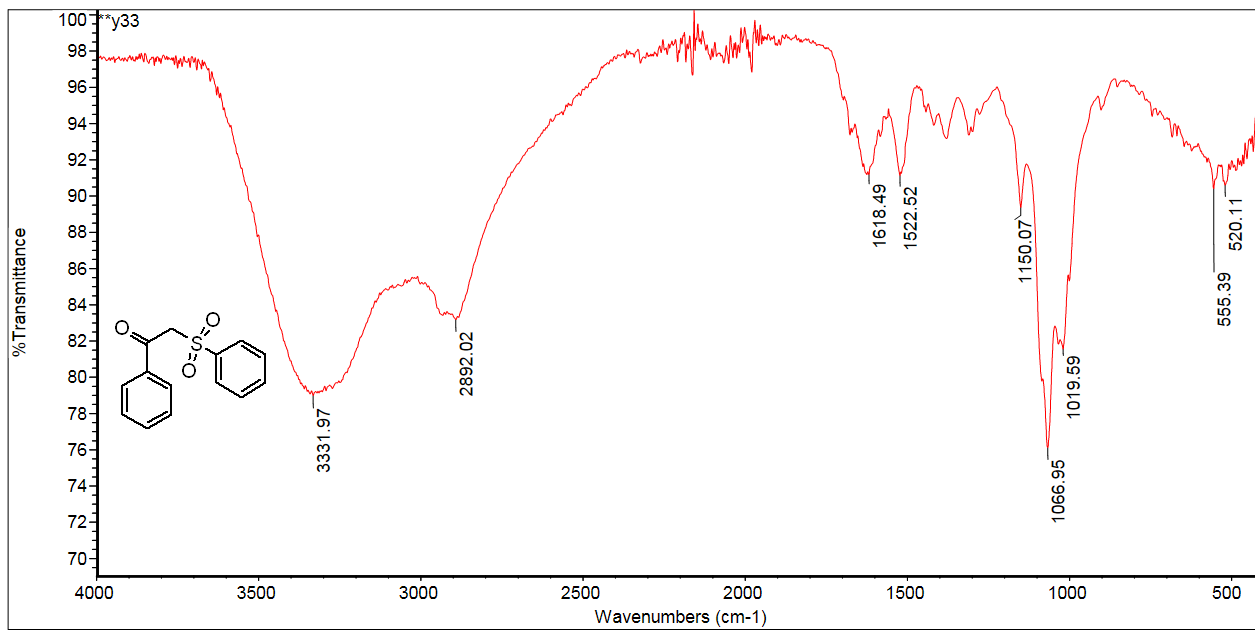

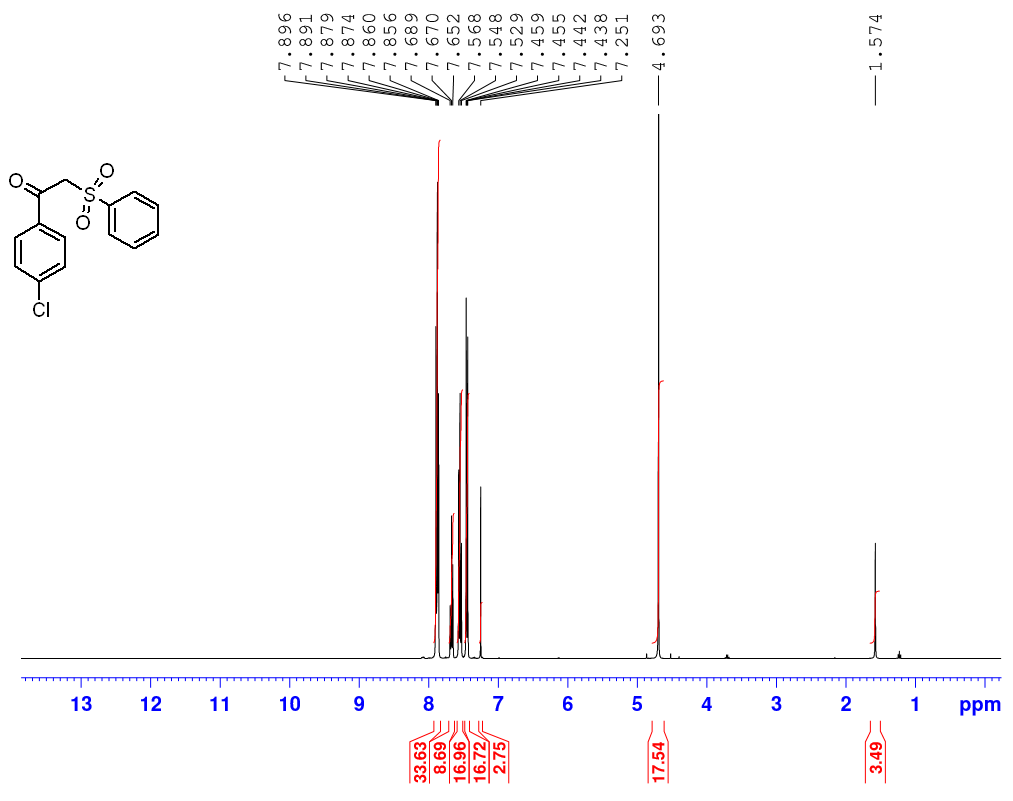

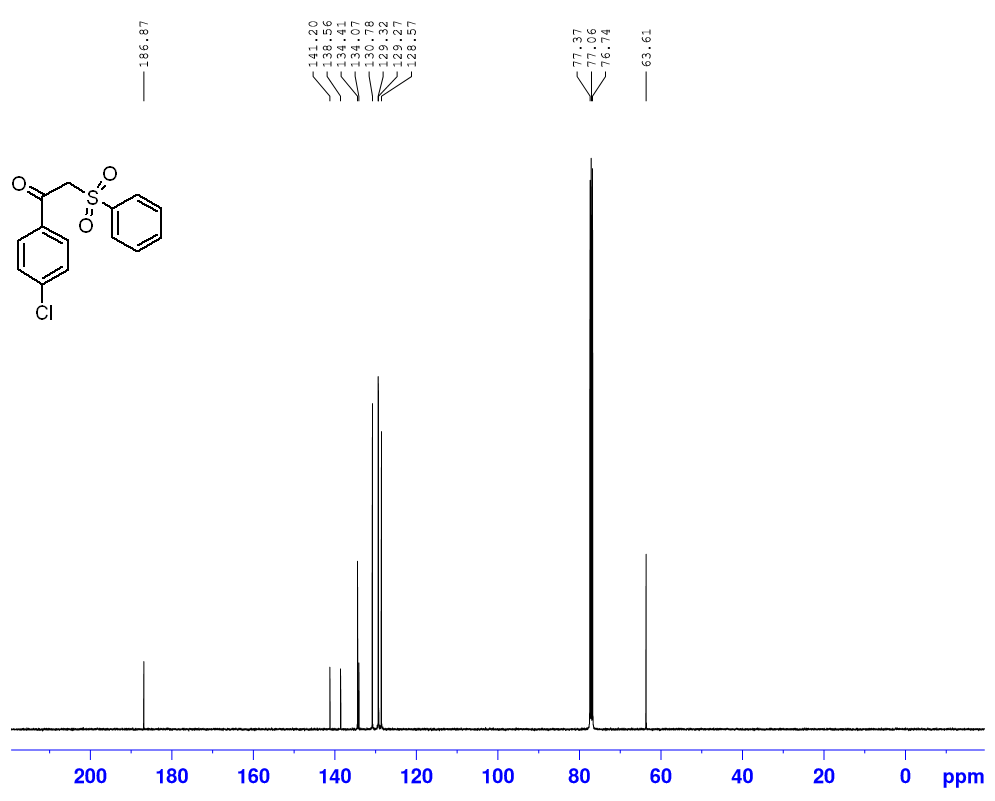


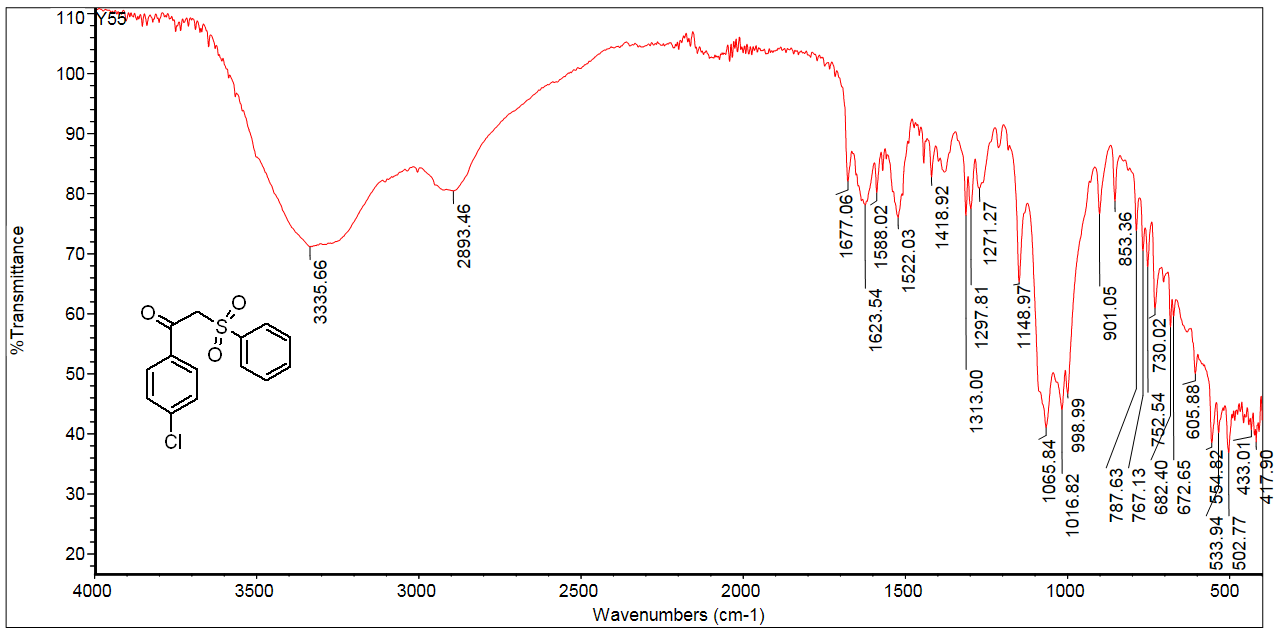


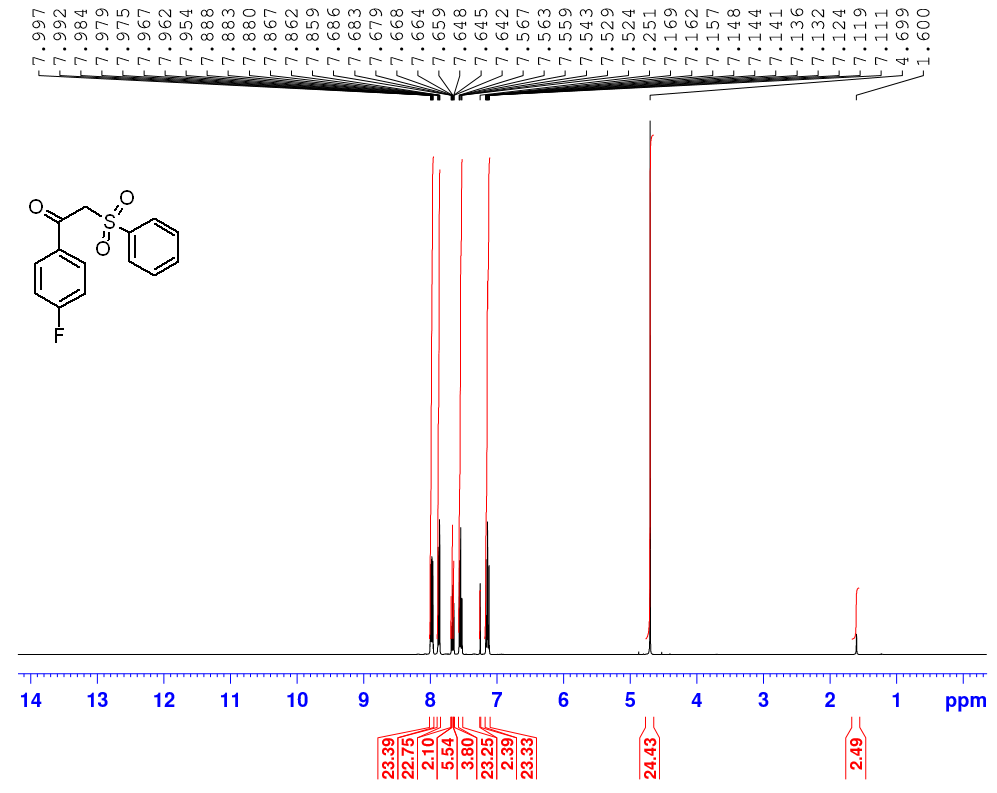


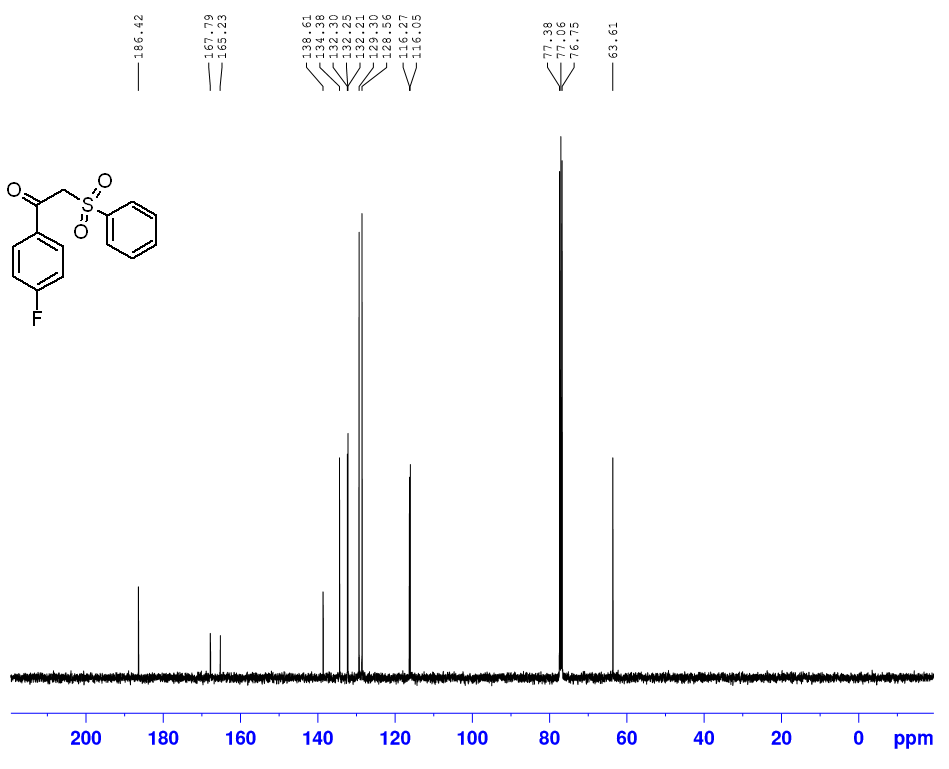


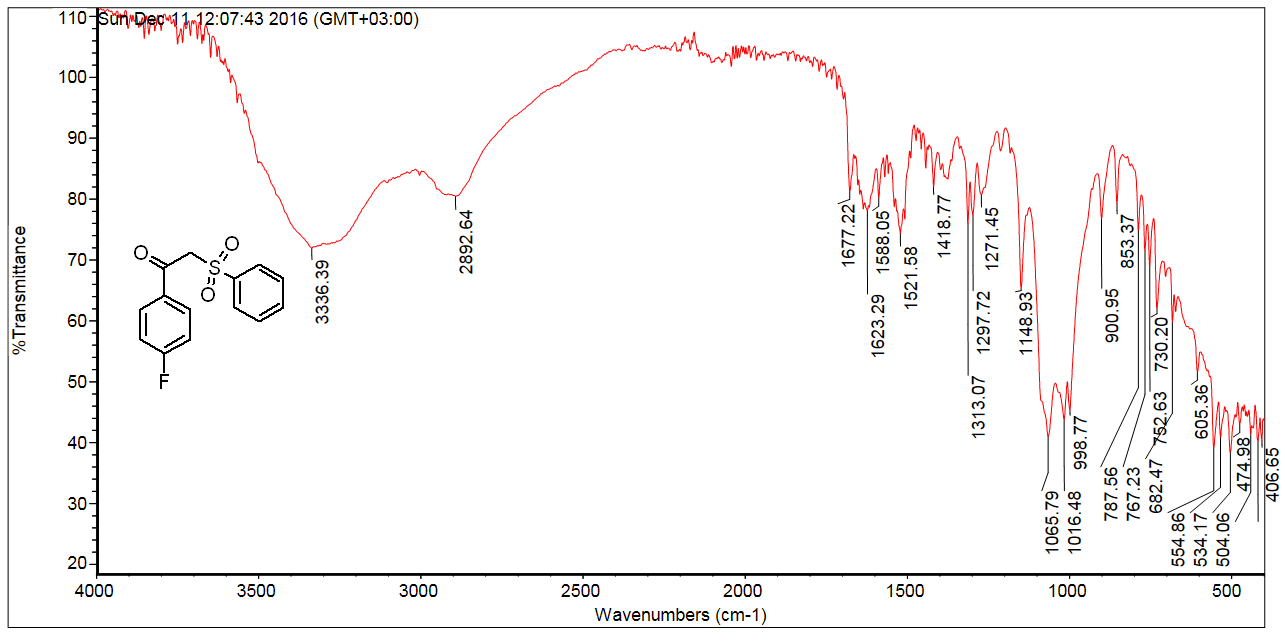

Supplement: Supplementary file 1 [file 13901288]
